# Supplementary material
Source: PubMed Central journal article supplement (PMC2814753)
Supplement: mcp280_1.pdf [file mcp280_1.pdf]

# SUPPLEMENTARY DATA

Morphological matrix analysed in the phylogenetic analysis of the resin-producing Detarieae.

|                                        | 1          | 10         | 20         | 30         | 40         | 50         | 60         | 70         | 80         | 89        |     |
|----------------------------------------|------------|------------|------------|------------|------------|------------|------------|------------|------------|-----------|-----|
| <i>Dialium guianensis</i>              | 0011000011 | 0010000000 | 0010000111 | 1-01000000 | 00-0000201 | 15----     | 2030       | 0000010110 | 3010100??? | 000???    | 000 |
| <i>Bauhinia bohniana</i>               | 020-1-0001 | 000?000000 | 00?010-??? | 0000000100 | 0110001001 | 0000030130 | 1101000112 | 1005200??? | 00?????    | 000       | 000 |
| <i>Cercis canadensis</i>               | 020-000002 | 0000000010 | 0010100010 | 0001100000 | 010001?000 | 0022030030 | 1000100001 | 0005220110 | 000???     | 000       | 000 |
| <i>Amherstia nobilis</i>               | 1010000011 | 0000010010 | 1010000010 | 0000113101 | 0110100000 | 0011030011 | 0110000112 | 0105201?00 | 00?????    | 200       | 000 |
| <i>Aphanocalyx cynometroides</i>       | 1110110013 | 1000011000 | 1100110110 | 1000111100 | 00-40--010 | 041--00021 | 0100100011 | 0105101?00 | 030011200  |           |     |
| <i>Brachystegia bussei</i>             | 1010101121 | 1100010110 | 1010010010 | 1000111100 | 00-000000  | 05----     | 0011       | 0100000011 | 0105201?00 | 030011200 |     |
| <i>Brownea grandiceps</i>              | 1010100011 | 00000100?? | 1?10000110 | 0000111110 | 0110100000 | 0000033011 | 1100010112 | 0115201?00 | 00?????    | 200       |     |
| <i>Cryptosepalum tetraphyllum</i>      | 1010110110 | 1000010100 | 1010010200 | 0000111100 | 010???     | 02000      | 041--32031 | 0100010112 | 0105101?00 | 020011200 |     |
| <i>Cynometra mannii</i>                | 1010111010 | 11100010?? | 1?10000110 | 0000000000 | 0100100001 | 0000200031 | 0100110011 | 0115001?0? | 00?????    | 000       |     |
| <i>Hymenostegia floribunda</i>         | 1010111010 | 1110011011 | 1010000110 | 0000113100 | 0110100000 | 1021000031 | 0100110112 | 0115101?00 | 000010200  |           |     |
| <i>Loesenera kalantha</i>              | 1010101010 | 1000000110 | 1010000110 | 1000112000 | 0110100001 | 0001030031 | 1100010112 | 011520??00 | 00?????    | 100       |     |
| <i>Goniorrhachis marginata</i>         | 1010111013 | 1100101100 | 1001010110 | 1-1-102100 | 0110100201 | 0000230031 | 0100110112 | 311520?101 | 00?????    | 000       |     |
| <i>Barnebydendron riedelii</i>         | 1010101011 | 100?010110 | 1001000?00 | 1000100000 | 0100100000 | 0021000021 | 0100010101 | 0115211101 | 00?????    | 000       |     |
| <i>Schotia afra</i>                    | 1010000111 | 1010100000 | 1000000110 | 1000000000 | 0110100000 | 0000200031 | 0100100102 | 0115201101 | 000111101  |           |     |
| <i>Schotia brachypetala</i>            | 1010000113 | 1010100010 | 1001000110 | 1000000000 | 0110100000 | 0001200031 | 0100000102 | 0115201101 | 000111101  |           |     |
| <i>Schotia latifolia</i>               | 1010000113 | 1010100010 | 1001000110 | 1000100000 | 0110100000 | 0001200031 | 0100000102 | 0115201101 | 00011110?  |           |     |
| <i>Colophospermum mopane</i>           | 11101-0003 | 1000001100 | 100010-000 | 0000112100 | 00-3?0-000 | 05----     | 3031       | 0100010101 | 1?01000000 | 100000000 |     |
| <i>Hardwickia binata</i>               | ?1101-0003 | 1000001112 | 000010-000 | 0000112100 | 00-2?00000 | 05----     | 0031       | 0100010000 | 0-01050?0? | 10?????   | 300 |
| <i>Gossweilerodendron balsamiferum</i> | 1021101011 | 1000010100 | 1011001010 | 101-100100 | 0100?00000 | 05----     | 0031       | 1100112011 | 3106050000 | 011-20000 |     |
| <i>Kingiodendron alternifolium</i>     | ?021100011 | 000001000? | ??10000010 | 1000100100 | 30-0000000 | 05----     | 0031       | 1100010010 | 3102000000 | 01?????   | 000 |
| <i>Kingiodendron pinnatum</i>          | 1022100011 | 0000000100 | 1010000010 | 1000100100 | 3100000000 | 05----     | 0031       | 1100010010 | 3102050000 | 01?????   | 000 |
| <i>Prioria copaifera</i>               | 1010100011 | 0000010100 | 1010001010 | 101-102100 | 0100000000 | 05----     | 0031       | 1100012011 | 3106000000 | 02?????   | 000 |
| <i>Oxystigma buchholzii</i>            | ?022100010 | 000001000? | ??10000010 | 1000100100 | 0100000000 | 05----     | 0031       | 1100010010 | 0116050000 | 011-20000 |     |
| <i>Oxystigma gilbertii</i>             | ?010100010 | 001001010? | ??10000010 | 1000100100 | 00-0000001 | 15----     | 0031       | 1100112010 | 3116050000 | 011-20000 |     |
| <i>Oxystigma mannii</i>                | 1022100010 | 0000010100 | 1010000110 | 1000100100 | 00-0000001 | 05----     | 0031       | 1100112010 | 0116000000 | 011-20000 |     |
| <i>Oxystigma msoc</i>                  | 1021100011 | 0000010100 | 1010000110 | 1000100100 | 0100000001 | 15----     | 0031       | 1100112011 | 3106050000 | 011-20000 |     |
| <i>Oxystigma oxyphyllum</i>            | ?012100010 | 000001000? | ??10000010 | 1000100100 | 00-0000001 | 15----     | 0031       | 1100010010 | 3106050000 | 011-20000 |     |
| <i>Neoapaloxyton madagascariense</i>   | ?012001011 | 10000010?? | ??31000000 | 101-00???  | 00-0100000 | 05----     | 0031       | 0100010001 | 011605??00 | 00?????   | 000 |
| <i>Brandzeia filicifolia</i>           | ?011000011 | 10100000?0 | ??11000000 | 10000000?0 | 0100100000 | 0010230031 | 0100010001 | 010605??00 | 02?????    | 000       |     |
| <i>Daniellia klainei</i>               | 1010000011 | 0000010010 | 1110000000 | 1000002000 | 0110100001 | 0021000021 | 1100010102 | 0115201101 | 020010100  |           |     |
| <i>Daniellia ogea</i>                  | 1010000011 | 0000010010 | 1110000010 | 1000002000 | 0110100001 | 0021000021 | 1100010112 | 0105201101 | 020010100  |           |     |
| <i>Daniellia oliveri</i>               | 1010000011 | 0000010010 | 1110000000 | 1000002000 | 0110100000 | 0010000031 | 1100010102 | 0105201101 | 020010100  |           |     |
| <i>Daniellia soyauxii</i>              | 1010000011 | 0000010010 | 1110000010 | 1000002000 | 0110100001 | 0021000021 | 1100010112 | 0105201101 | 020010100  |           |     |
| <i>Guibourtia arnoldiana</i>           | ?110110003 | 1000011110 | 0000001110 | 101000---0 | 00-0100100 | 15----     | 0031       | 0100010111 | 3105001101 | 030110000 |     |
| <i>Guibourtia hymenaeifolia</i>        | ?110110003 | 10000111?? | ??00001000 | 1000000000 | 00-0100101 | 15----     | 0031       | 0100010111 | 0115101101 | 030110401 |     |
| <i>Guibourtia coleosperma</i>          | ?110110003 | 1000011110 | 0000001000 | 1000000000 | 00-0100100 | 15----     | 0031       | 0100010111 | 0115101101 | 030110401 |     |
| <i>Guibourtia demeusei</i>             | 1110110003 | 1000011110 | 0000001010 | 101-102000 | 00-0100101 | 15----     | 0031       | 0100111101 | 0105101101 | 030110000 |     |
| <i>Guibourtia ehie</i>                 | 1110110003 | 1000011110 | 0000001110 | 101-000000 | 00-0100100 | 15----     | 0031       | 0100010111 | 0105101101 | 030110000 |     |

|                                        | 1          | 10         | 20          | 30         | 40         | 50         | 60         | 70         | 80         | 89        |
|----------------------------------------|------------|------------|-------------|------------|------------|------------|------------|------------|------------|-----------|
| <i>Guibourtia pellegriniana</i>        | 1110110003 | 10000111?? | ??00001010  | 101-000000 | 00-0100100 | 15----     | 0031       | 0100010111 | 0115101101 | 030110401 |
| <i>Guibourtia tessmannii</i>           | ?110110003 | 10000011?? | ??00001010  | 1010000000 | 00-0100100 | 15----     | 0031       | 0100010111 | 3115101101 | 030110401 |
| <i>Hymenaea courbaril</i>              | 1110110011 | 1000011110 | 0000000110  | 1000002000 | 0110100201 | 1000000031 | 0100010102 | 0105201101 | 000110010  |           |
| <i>Hymenaea eriogyne</i>               | ?110010001 | 10000111?? | ??00000110  | 1000002000 | 0100100201 | 1000030031 | 0100010112 | 0115201101 | 000110010  |           |
| <i>Hymenaea oblongifolia</i>           | 1110110013 | 1000010110 | 0000000110  | 1000002000 | 0110100201 | 1000030031 | 0100010112 | 0105201101 | 000110010  |           |
| <i>Hymenaea parvifolia</i>             | ?110110013 | 1000010110 | 0000000010  | 1000002000 | 0100100201 | 1000000031 | 0100010112 | 0105201101 | 000110010  |           |
| <i>Hymenaea stigonocarpa var stig.</i> | ?110110013 | 1000010110 | 0000000010  | 1000002000 | 0110100201 | 1000000031 | 0100010102 | 0105201101 | 000110010  |           |
| <i>Hymenaea stigonocarpa var pub.</i>  | ?110110011 | 1000010110 | 0000000110  | 1000002000 | 0110100201 | 1000000031 | 0100010102 | 0105201101 | 000110010  |           |
| <i>Hymenaea verrucosa</i>              | 1110110003 | 1000010110 | 0000000010  | 1000002000 | 0110100201 | 1001030031 | 0100010112 | 0105201101 | 000110010  |           |
| <i>Peltogyne floribunda</i>            | ?110100011 | 01000?01?? | ??00000010  | 10000000?0 | 00-0100201 | 0000000031 | 0100010111 | 0115201101 | 00????001  |           |
| <i>Peltogyne pauciflora</i>            | ?110110013 | 10001011?? | ??000000210 | 100000?000 | 00-0100201 | 0000000031 | 0100110101 | 0115201101 | 00????001  |           |
| <i>Peltogyne paniculata</i>            | ?110110011 | 0000100110 | 0001000010  | 1000002000 | 0110100201 | 1000000031 | 0100110111 | 0115201101 | 00????001  |           |
| <i>Peltogyne venosa</i>                | ?110110011 | 10000001?? | ??00000010  | 1000002000 | 0100100201 | 1000010031 | 0100110111 | 0105201101 | 00????001  |           |
| <i>Peltogyne confertiflora</i>         | 1110110011 | 10001001?0 | 1000000010  | 1000000000 | 0110100201 | 1000000031 | 0100110101 | 0115201101 | 00????001  |           |
| <i>Gilletiodendron pierreanum</i>      | 1022101010 | 1000101100 | 1031010220  | 1100000000 | 0100100101 | 1000200031 | 0100010102 | 011520110? | 000011101  |           |
| <i>Hylodendron gabunense</i>           | 1021000011 | 0000000110 | 1111000110  | 1100000100 | 00-0100100 | 05----     | 0031       | 0100010100 | 0105251111 | 000110000 |
| <i>Eperua bijuga</i>                   | ?010000011 | 0010100011 | 1120000010  | 1000102000 | 0110100201 | 0010000021 | 1100010102 | 0105201101 | 02????200  |           |
| <i>Eperua falcata</i>                  | 1010100011 | 0010100000 | 1120000110  | 1001002101 | 0110100201 | 0010000121 | 1100110112 | 0115201101 | 02????200  |           |
| <i>Eperua grandiflora</i>              | ?010001011 | 0010100010 | 1020000010  | 1000100100 | 0110100201 | 0010000120 | 1100000102 | 0115101101 | 02????200  |           |
| <i>Eperua rubiginosa</i>               | 1010000011 | 0010100010 | 1120000010  | 1001000001 | 0110100201 | 0010000021 | 1100100112 | 0105201101 | 02????200  |           |
| <i>Eperua schomburgkiana</i>           | ?010000011 | 0010100011 | 1020000010  | 1000100000 | 0110100201 | 0010000021 | 1100010112 | 0105201101 | 02????200  |           |
| <i>Eurypetalum unijugum</i>            | ?110101010 | 00001001?? | ??00000000  | 0000000000 | 0100100200 | 0010000021 | 1100010012 | 310510?101 | 00????200  |           |
| <i>Eurypetalum tessmannii</i>          | 1010101010 | 0000000111 | 1000000110  | 1000100100 | 0110100200 | 0010000021 | 1100110012 | 311510?101 | 00????200  |           |
| <i>Stemonocoleus micranthus</i>        | 1021001011 | 0100100100 | 1121000000  | 1000000100 | 0110100000 | 15----     | 2011       | 0100110002 | 010510?101 | 000110000 |
| <i>Augouardia letestui</i>             | 1010000010 | 00000000?0 | 1031000010  | 1000102100 | 0100100000 | 05----     | 2130       | 0100010110 | 310510?100 | 00??????? |
| <i>Baikiaea insignis</i>               | 1021101010 | 0000100000 | 1131000010  | 0100000000 | 00-0100101 | 1000200021 | 0100010111 | 0105201101 | 000010201  |           |
| <i>Baikiaea plurijuga</i>              | ?010000011 | 0100100000 | 1131000110  | 0100000000 | 00-0100101 | 1000200021 | 1100010111 | 0105201101 | 000010201  |           |
| <i>Tessmannia africana</i>             | 1022101011 | 1101010100 | 1010010110  | 1100000000 | 00-0100111 | 1000230020 | 1100100111 | 0115201101 | 020011000  |           |
| <i>Tessmannia anomala</i>              | 1022001011 | 1101011100 | 1020000110  | 1100000000 | 00-0100111 | 1020030021 | 1100100111 | 0115201101 | 020011000  |           |
| <i>Tessmannia dewildemania</i>         | ?021100011 | 1100010111 | 1020000010  | 1100000000 | 00-0100111 | 1000030020 | 1100100111 | 0105201101 | 020011000  |           |
| <i>Tessmannia lescrauwaetii</i>        | 1022101011 | 1101011100 | 1020010110  | 1100000000 | 00-0100111 | 1020030021 | 1100100111 | 0105201101 | 020011000  |           |
| <i>Detarium macrocarpum</i>            | 1021000011 | 0001110011 | 1031000000  | 1100000000 | 00-0100100 | 15----     | 0030       | 0100010010 | 31051011?? | 020010000 |
| <i>Detarium microcarpum</i>            | ?022000011 | 0101100111 | 1031000110  | 1100000000 | 00-0100101 | 15----     | 0031       | 1100010010 | 01051011?? | 020010000 |
| <i>Detarium senegalense</i>            | 1022000011 | 0101100011 | 1031000110  | 111-000-00 | 00-0100101 | 15----     | 0031       | 0100010010 | 31051011?? | 020010000 |
| <i>Copaifera coriacea</i>              | ?010000011 | 01101001?? | ??31000110  | 111-000-00 | 00-0100101 | 15----     | 0031       | 0100110111 | 3115101111 | 020010101 |
| <i>Copaifera guianensis</i>            | ?010000011 | 10101001?? | ??31000010  | 111-000-00 | 00-0100101 | 15----     | 0031       | 0100010111 | 0115101111 | 020010101 |
| <i>Copaifera langsdorfii</i>           | ?010001011 | 1110100110 | 1031000110  | 111-000-00 | 00-0100101 | 15----     | 0031       | 0100110111 | 0115101111 | 020010101 |
| <i>Copaifera mildbraedii</i>           | ?012001011 | 1110100110 | 1031000110  | 111-000-00 | 00-0100101 | 15----     | 0031       | 0100110111 | 0105101111 | 020011101 |
| <i>Copaifera multijuga</i>             | ?021001011 | 00101001?? | ??31000110  | 111-000-00 | 00-0100100 | 15----     | 0031       | 0100010111 | 0115101111 | 020010101 |
| <i>Copaifera oblongifolia</i>          | ?010100011 | 11101011?? | ??31000110  | 111-000-00 | 00-0100100 | 15----     | 0031       | 0100010111 | 0115101111 | 020010101 |
| <i>Copaifera officinalis</i>           | ?010100011 | 1110100110 | 1031010110  | 111-000-00 | 00-0100101 | 15----     | 0031       | 0100110111 | 0115101111 | 020010101 |
| <i>Copaifera salikounda</i>            | 1010101011 | 1110100110 | 1031010210  | 111-100-00 | 00-0100101 | 15----     | 0031       | 0100110111 | 0115101111 | 020011101 |

|                                | 1 | 10        | 20          | 30          | 40         | 50         | 60         | 70         | 80          | 89          |           |
|--------------------------------|---|-----------|-------------|-------------|------------|------------|------------|------------|-------------|-------------|-----------|
| <i>Copaifera trapezifolia</i>  | ? | 012000011 | 00101011110 | 10310101110 | 111-000-00 | 00-0100101 | 15----     | 0031       | 01001101111 | 01051011111 | 020010101 |
| <i>Pseudosindora palustris</i> | ? | 022001011 | 1000100110  | 1031000110  | 1100000000 | 0100100101 | 15----     | 0031       | 01000101112 | 010510?111  | 02????101 |
| <i>Sindoropsis letestui</i>    | 1 | 021001011 | 0001100110  | 1031000110  | 0100100000 | 00-0100101 | 141--      | 30021      | 0100010110  | 011520?111  | 020111200 |
| <i>Sindora coriacea</i>        | ? | 010100011 | 10011001??  | ??31000010  | 1100000000 | 00-0100111 | 1211000121 | 1100101111 | 0105201111  | 020010101   |           |
| <i>Sindora klaineana</i>       | ? | 011100011 | 0001100111  | 1031000010  | 1100000000 | 00-0100111 | 1010000121 | 1100100111 | 0115101111  | 020010101   |           |
| <i>Sindora siamensis</i>       | ? | 010000011 | 0101100111  | 1031000110  | 1100000000 | 00-0100111 | 1211000121 | 1100100111 | 0115201111  | 020010101   |           |
| <i>Sindora supa</i>            | ? | 010001011 | 0101100111  | 1031000010  | 1100000000 | 00-0100111 | 1211000121 | 1100101111 | 0115201111  | 020010101   |           |
| <i>Sindora wallichii</i>       | ? | 010001011 | 0001100111  | 1031000110  | 1100000000 | 00-0100111 | 1211000121 | 1100100111 | 0115201111  | 020010101   |           |
| <i>Sindora bruggemanii</i>     | 1 | 010100011 | 0001100111  | 1031000110  | 1100000000 | 00-0100111 | 1211000121 | 1100100111 | 0105201111  | 020010101   |           |
